# Supplementary material for: Prediction of clinical response to drugs in ovarian cancer using the chemotherapy resistance test (CTR-test)
Source: PubMed Central journal article supplement (PMC5658930; doi:10.1186/s13048-017-0365-9), 2017-10-27
Supplement: 13048_2017_365_MOESM1_ESM.pdf [file 13048_2017_365_MOESM1_ESM.pdf]

### Monotherapy

| Non-Responder    |         |           |                 |                                |                               | Responder        |         |           |                 |                                |                               |
|------------------|---------|-----------|-----------------|--------------------------------|-------------------------------|------------------|---------|-----------|-----------------|--------------------------------|-------------------------------|
| TherapySelect ID | Patient | Substance | CTR-Test result | Percentage of viable cells [%] | Percentage of tumor cells [%] | TherapySelect ID | Patient | Substance | CTR-Test result | Percentage of viable cells [%] | Percentage of tumor cells [%] |
| TS00427          | 1       | Carbo     | ER              | >90%                           | 80%                           | TS00507          | 13      | Pac       | SR              | 95%                            | 90%                           |
| TS00429          | 2       | Caelyx    | SR              | >80%                           | 80%                           | TS00560          | 14      | Carbo     | SR              | 60%                            | 60%                           |
| TS00442          | 3       | Topo      | SR              | 80%                            | 90%                           | TS00752          | 15      | Topo      | SR              | 90%                            | 90%                           |
| TS00527          | 4       | Carbo     | SR              | 85%                            | 90%                           | TS00585          | 16      | Pac       | MR              | 80%                            | 90%                           |
| TS00542          | 5       | Topo      | MR              | 80%                            | 90%                           |                  |         |           |                 |                                |                               |
| TS00584/E008.102 | 6       | Topo      | MR              | 80%                            | 90%                           |                  |         |           |                 |                                |                               |
| TS00601          | 7       | Caelyx    | MR              | 90%                            | 90%                           |                  |         |           |                 |                                |                               |
| TS00654          | 8       | Caelyx    | ER              | 85%                            | 80%                           |                  |         |           |                 |                                |                               |
| TS00684          | 9       | Caelyx    | MR              | 50%                            | 90%                           |                  |         |           |                 |                                |                               |
| TS00701          | 10      | Topo      | SR              | 90%                            | 70%                           |                  |         |           |                 |                                |                               |
| TS00720          | 11      | Topo      | ER              | 60%                            | 50%                           |                  |         |           |                 |                                |                               |
| TS00581          | 12      | Topo      | ER              | 80%                            | 90%                           |                  |         |           |                 |                                |                               |

### (Mono)

| Non-Responder    |         |                  |                 |                                |                               | Responder        |         |                  |                 |                                |                               |
|------------------|---------|------------------|-----------------|--------------------------------|-------------------------------|------------------|---------|------------------|-----------------|--------------------------------|-------------------------------|
| TherapySelect ID | Patient | Substance        | CTR-Test result | Percentage of viable cells [%] | Percentage of tumor cells [%] | TherapySelect ID | Patient | Substance        | CTR-Test result | Percentage of viable cells [%] | Percentage of tumor cells [%] |
| TS00763          | 1       | Caelyx + Avastin | SR              | 90%                            | not known                     | TS00509          | 2       | Caelyx + Avastin | SR              | 80%                            | 80%                           |
|                  |         |                  |                 |                                |                               | TS00580          | 3       | Topo + Avastin   | MR              | 80%                            | 90%                           |

### Combination Chemotherapy

| Non-Responder    |         |              |                 |                                |                               | Responder        |         |              |                 |                                |                               |
|------------------|---------|--------------|-----------------|--------------------------------|-------------------------------|------------------|---------|--------------|-----------------|--------------------------------|-------------------------------|
| TherapySelect ID | Patient | Substance    | CTR-Test result | Percentage of viable cells [%] | Percentage of tumor cells [%] | TherapySelect ID | Patient | Substance    | CTR-Test result | Percentage of viable cells [%] | Percentage of tumor cells [%] |
| TS00525_E008.092 | 1       | Carbo/Pac    | ER/ER           | 70%                            | 85%                           | TS00446          | 9       | Carbo/Caelyx | SR/SR           | 80%                            | 70%                           |
| TS00557          | 2       | Carbo/Caelyx | MR/ER           | 90%                            | 80%                           | TS00447          | 10      | Carbo/Gem    | SR/SR           | 80-90%                         | 90%                           |
| TS00597          | 3       | Carbo/Gem    | ER/ER           | 70%                            | 80%                           | TS00505          | 11      | Carbo/Pac    | SR/SR           | 70%                            | 85%                           |
| TS00639          | 4       | Carbo/Pac    | SR/SR           | 70%                            | 50%                           | TS00535          | 12      | Carbo/Caelyx | SR/ER           | 80%                            | 90%                           |
| TS00698          | 5       | Carbo/Gem    | ER/ER           | 50%                            | 40%                           | TS00558          | 13      | Carbo/Caelyx | SR/ER           | 80%                            | 80%                           |
| E026.007         | 6       | Carbo/Pac    | ER/SR           | 90%                            | 90%                           | TS00587          | 14      | Carbo/Caelyx | SR/MR           | 80%                            | 60%                           |
| TS00796          | 7       | Carbo/Caelyx | MR/ER           | 60%                            | 80%                           | TS00644          | 15      | Carbo/Caelyx | SR/SR           | 90%                            | 80%                           |
| TS00724          | 8       | Carbo/Pac    | MR/ER           | 80%                            | 90%                           | TS00650          | 16      | Carbo/Pac    | MR/ER           | 90%                            | 80%                           |
|                  |         |              |                 |                                |                               | TS00653          | 17      | Carbo/Pac    | SR/MR           | 70%                            | 80%                           |
|                  |         |              |                 |                                |                               | TS00660          | 18      | Carbo/Caelyx | MR/SR           | 90%                            | 60%                           |
|                  |         |              |                 |                                |                               | TS00661_E008.102 | 19      | Carbo/Caelyx | SR/SR           | 90%                            | 95%                           |
|                  |         |              |                 |                                |                               | TS00676          | 20      | Carbo/Pac    | SR/MR           | 80%                            | 90%                           |
|                  |         |              |                 |                                |                               | TS00680          | 21      | Carbo/Caelyx | SR/MR           | 70%                            | 90%                           |
|                  |         |              |                 |                                |                               | TS00699          | 22      | Carbo/Gem    | ER/SR           | 80%                            | 70%                           |
|                  |         |              |                 |                                |                               | TS00711          | 23      | Carbo/Pac    | SR/SR           | 70%                            | 90%                           |
|                  |         |              |                 |                                |                               | TS00745          | 24      | Carbo/Caelyx | MR/MR           | 90%                            | 80%                           |
|                  |         |              |                 |                                |                               | E026.003         | 25      | Carbo/Pac    | SR/MR           | not known                      | not known                     |
|                  |         |              |                 |                                |                               | TS00748          | 26      | Carbo/Caelyx | MR/MR           | 80%                            | 90%                           |
|                  |         |              |                 |                                |                               | TS00750          | 27      | Carbo/Caelyx | SR/MR           | 90%                            | 90%                           |
|                  |         |              |                 |                                |                               | E026.004         | 28      | Carbo/Pac    | SR/MR           | not known                      | not known                     |
|                  |         |              |                 |                                |                               | E026.005         | 29      | Carbo/Pac    | SR/MR           | not known                      | not known                     |
|                  |         |              |                 |                                |                               | TS00759          | 30      | Carbo/Pac    | SR/SR           | 90%                            | 80%                           |
|                  |         |              |                 |                                |                               | E026.006         | 31      | Carbo/Pac    | SR/SR           | 90%                            | 80%                           |
|                  |         |              |                 |                                |                               | TS00797          | 32      | Carbo/Pac    | ER/SR           | 70%                            | 80%                           |
|                  |         |              |                 |                                |                               | TS00747          | 33      | Carbo/Caelyx | SR/SR           | 90%                            | 75%                           |
